# Supplementary material
Source: PubMed Central journal article supplement (PMC4636925)
Supplement: NIHMS718661-supplement-Supp_FigureS1.pdf [file NIHMS718661-supplement-Supp_FigureS1.pdf]

# **Live imaging of endogenous CaMKII in neurons reveals that ischemia-related aggregation does not require kinase activity**

Kelsey Barcomb<sup>\*</sup>, Dayton J. Goodell<sup>\*</sup>, Don B. Arnold<sup>†</sup>, and K. Ulrich Bayer<sup>\*</sup>

<sup>\*</sup>Department of Pharmacology, University of Colorado School of Medicine, Anschutz Medical Campus, Aurora, Colorado 80045, USA;

<sup>†</sup>Department of Biology, University of Southern California, Los Angeles, California 90089, USA.

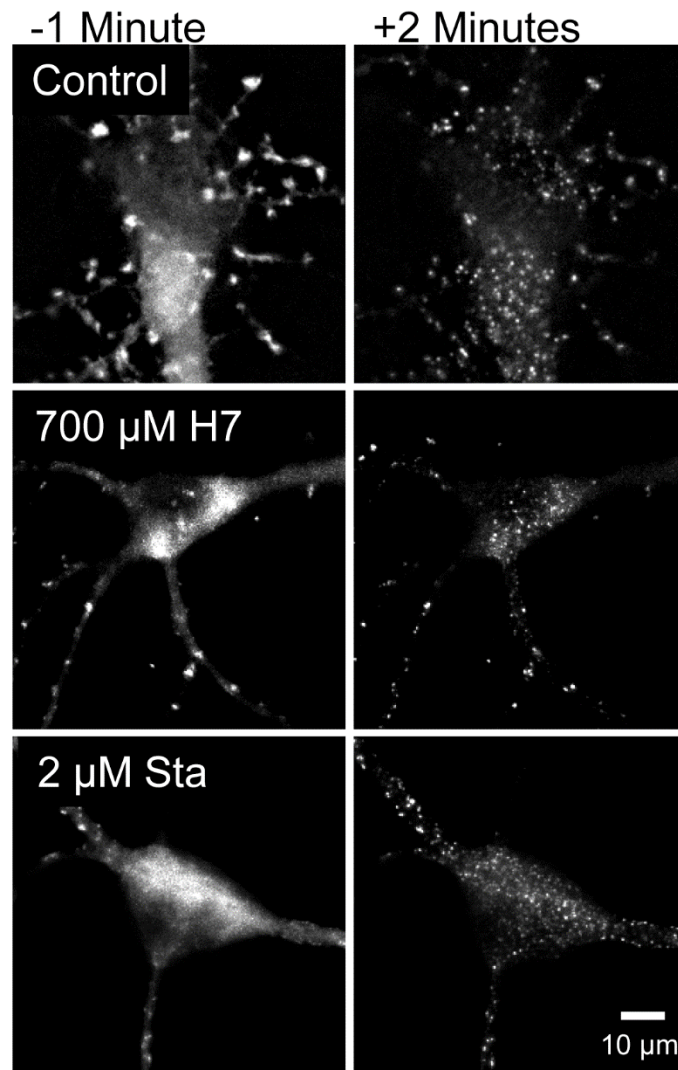

**Supplementary Figure S1:** Staurosporine (Sta; 2  $\mu$ M) and H7 (700  $\mu$ M) do not block the glutamate/glycine-induced aggregation of GFP-CaMKII that was overexpressed in hippocampal neurons, similar as observed for endogenous CaMKII (see Fig. 5).

**Supplementary Movies S1-S4:** Glutamate/glycine induced aggregation of endogenous CaMKII monitored in a live hippocampal neuron using a GFP-labelled FingR. Timepoint of glutamate/glycine addition is indicated by appearance of a blue spot in the upper right corner.

Supplementary Movie S1: Control conditions without inhibitor allows aggregation.

Supplementary Movie S2: Aggregation is inhibited by 5  $\mu$ M tatCN21.

Supplementary Movie S3: Aggregation is inhibited by 5  $\mu$ M tatCN19o.

Supplementary Movie S4: Aggregation occurs in the presence of 2  $\mu$ M staurosporine.
